# Supplementary material for: High-dimensional profiling of regulatory T cells in psoriasis reveals an impaired skin-trafficking property
Source: PubMed Central journal article supplement — eBioMedicine. 2024 Feb 1;100:104985. doi: 10.1016/j.ebiom.2024.104985 (PMC10847473; doi:10.1016/j.ebiom.2024.104985), 2024-02-01

# Supplementary Materials

## High-dimensional profiling of regulatory T cells in psoriasis reveals an impaired skin-trafficking property

Brian Hyohyoung Lee,<sup>a,b,1</sup> Yoon Ji Bang,<sup>a,1</sup> Sung Ha Lim, MD,<sup>c,1</sup> Seong-Jun Kang, PhD,<sup>a,d</sup> Sung Hee Kim,<sup>e</sup> Seunghee Kim-Schulze, PhD,<sup>b</sup> Chung-Gyu Park, MD, PhD,<sup>a,d,f,g,h,i,†</sup> Hyun Je Kim, MD, PhD,<sup>a,d,f,g,i,j,†</sup> Tae-Gyun Kim, MD, PhD<sup>e,k,†</sup>

**Supplementary Table S1. CyTOF antibody panel information.**

**Supplementary Table S2. Simple and multiple linear regression analyses of frequency and expression of skin-homing markers in circulating Treg in people with psoriasis compared to healthy controls.**

**Supplementary Figure S1. Comparison of manual gating vs. heatmap-based cell-type annotation.**

**Supplementary Figure S2. Comparison of FoxP3 expression in CD39<sup>hi</sup> and CD39<sup>low</sup> Tregs.**

**Supplementary Figure S3. PCA and sex-confounder analysis of CyTOF PBMC data.**

**Supplementary Figure S4. Comparison of PASI score to production of IL-17A<sup>+</sup> by psoriatic CD4<sup>+</sup>ROR $\gamma$ t<sup>+</sup> T cells and CCR7<sup>+</sup> Tregs by FACS.**

**Supplementary Table S1. CyTOF antibody panel information.**

| <b>Metal</b> | <b>Marker</b> | <b>Clone</b> | <b>Vendor</b> | <b>Catalog</b> |
|--------------|---------------|--------------|---------------|----------------|
| 89 Y         | CD45          | HI30         | Fluidigm      | 3089003B       |
| 113 In       | CD57          | HNK-1        | Biologend     | 359602         |
| 115 In       | CD11c         | Bu15         | Biologend     | 337202         |
| 141 Pr       | CLA           | HECA-452     | Biologend     | 321302         |
| 142 Nd       | CD19          | REA675       | Miltenyi      | 130-122-301    |
| 143 Nd       | CD45RA        | REA562       | Miltenyi      | 130-122-292    |
| 144 Nd       | KLRG1         | SA231A2      | Biologend     | 367702         |
| 145 Nd       | CD4           | REA623       | Miltenyi      | 130-122-283    |
| 146 Nd       | CD8           | REA734       | Miltenyi      | 130-122-281    |
| 147 Sm       | ICOS          | C398.4A      | Biologend     | 313502         |
| 148 Nd       | CD16          | REA423       | Miltenyi      | 130-108-027    |
| 149 Sm       | CD127         | A019D5       | Fluidigm      | A019D5         |
| 150 Nd       | CD1c          | REA694       | Miltenyi      | 130-122-298    |
| 151 Eu       | CD123         | REA918       | Miltenyi      | 130-122-297    |
| 152 Sm       | CD66b         | REA306       | Miltenyi      | 130-108-019    |
| 153 Eu       | TIGIT         | MBSA43       | Fluidigm      | MBSA43         |
| 154 Sm       | CD86          | IT2.2        | Biologend     | 305449         |
| 155 Gd       | CD27          | REA499       | Miltenyi      | 130-122-295    |
| 156 Gd       | CCR5          | J418F1       | Biologend     | 359102         |
| 158 Gd       | CCR6          | G034E3       | Biologend     | 353402         |
| 159 Tb       | CTLA4 (CD152) | L3D10        | Biologend     | 349902         |
| 160 Gd       | CD14          | REA599       | Miltenyi      | 130-122-290    |
| 161 Dy       | CD56          | REA196       | Miltenyi      | 130-108-016    |
| 162 Dy       | FoxP3         | PCH101       | Fluidigm      | 3162011A       |
| 163 Dy       | CXCR5         | REA103       | Miltenyi      | 130-122-325    |
| 164 Dy       | CCR10         | 314306       | R&D           | MAB3478        |
| 165 Ho       | CRTH2         | REA598       | Miltenyi      | 130-122-305    |
| 166 Er       | CD117         | 104D2        | Biologend     | 313202         |
| 167 Er       | CCR7          | G043H7       | Fluidigm      | 3167009A       |
| 168 Er       | CD3           | REA613       | Miltenyi      | 130-122-282    |
| 169 Tm       | CD25          | REA570       | Miltenyi      | 130-122-302    |
| 170 Er       | CD38          | REA671       | Miltenyi      | 130-122-288    |
| 171 Yb       | CD39          | A1           | Biologend     | 328202         |
| 172 Yb       | Ki67          | B56          | Fluidigm      | 3172024B       |
| 173 Yb       | CXCR3         | REA232       | Miltenyi      | 130-108-022    |
| 174 Yb       | HLADR         | REA805       | Miltenyi      | 130-122-299    |
| 175 Lu       | PD-1          | EH12.2H7     | Fluidigm      | 329926         |
| 176 Yb       | CCR4          | REA279       | Miltenyi      | 130-122-323    |
| 209 Bi       | CD11b         | ICRF44       | Fluidigm      | 3209003B       |

**Supplementary Table S2. Simple and multiple linear regression analyses of frequency and expression of skin-homing markers in circulating Treg in patients with psoriasis compared to healthy controls.**

| Variables                                      | Simple Linear Regression |                  | Multiple Linear Regression |                  |
|------------------------------------------------|--------------------------|------------------|----------------------------|------------------|
|                                                | $\beta$                  | P value          | $\beta$                    | P value          |
| <b>Treg frequency</b>                          |                          |                  |                            |                  |
| Group                                          | 0.018                    | <b>&lt;0.001</b> | 0.019                      | <b>&lt;0.001</b> |
| Age                                            | 0.000                    | 0.325            | 0.000                      | 0.269            |
| Sex                                            | -0.003                   | 0.568            | 0.004                      | 0.309            |
| <b>Treg-CCR4 expression</b>                    |                          |                  |                            |                  |
| Group                                          | -5.946                   | <b>&lt;0.001</b> | -5.755                     | <b>&lt;0.001</b> |
| Age                                            | -0.046                   | 0.190            | -0.031                     | 0.167            |
| Sex                                            | 2.518                    | <b>0.013</b>     | 0.530                      | 0.440            |
| <b>Treg-CCR7 expression</b>                    |                          |                  |                            |                  |
| Group                                          | 4.712                    | <b>&lt;0.001</b> | 4.717                      | <b>&lt;0.001</b> |
| Age                                            | 0.014                    | 0.695            | 0.005                      | 0.854            |
| Sex                                            | -1.448                   | 0.153            | 0.047                      | 0.957            |
| <b>Treg-CXCR3 expression</b>                   |                          |                  |                            |                  |
| Group                                          | -1.765                   | <b>0.041</b>     | -2.083                     | <b>0.019</b>     |
| Age                                            | -0.050                   | 0.112            | -0.057                     | 0.067            |
| Sex                                            | -0.429                   | 0.645            | -1.455                     | 0.127            |
| <b>CLA<sup>hi</sup> Treg frequency</b>         |                          |                  |                            |                  |
| Group                                          | -0.215                   | <b>&lt;0.001</b> | -0.208                     | <b>&lt;0.001</b> |
| Age                                            | -0.003                   | 0.092            | -0.002                     | 0.091            |
| Sex                                            | 0.093                    | <b>0.045</b>     | 0.014                      | 0.720            |
| <b>CLA<sup>hi</sup> Treg-CCR4 expression</b>   |                          |                  |                            |                  |
| Group                                          | -6.047                   | <b>&lt;0.001</b> | -5.889                     | <b>&lt;0.001</b> |
| Age                                            | -0.051                   | 0.182            | -0.037                     | 0.172            |
| Sex                                            | 2.451                    | <b>0.027</b>     | 0.381                      | 0.664            |
| <b>CLA<sup>hi</sup> Treg-CCR7 expression</b>   |                          |                  |                            |                  |
| Group                                          | 4.683                    | <b>&lt;0.001</b> | 4.530                      | <b>&lt;0.001</b> |
| Age                                            | 0.014                    | 0.725            | 0.001                      | 0.975            |
| Sex                                            | -1.958                   | 0.084            | -0.549                     | 0.597            |
| <b>CLA<sup>hi</sup> Treg-CXCR3* expression</b> |                          |                  |                            |                  |
| Group                                          | -0.215                   | <b>0.039</b>     | -0.267                     | <b>0.011</b>     |
| Age                                            | -0.007                   | 0.077            | -0.008                     | <b>0.032</b>     |
| Sex                                            | -0.096                   | 0.392            | -0.231                     | <b>0.041</b>     |

Treg, regulatory T cell;  $\beta$ , standardized regression coefficient; CLA, cutaneous lymphocyte antigen

Group indicates psoriasis vs healthy control cohorts

\*Arcsinh (cofactor=5) transformation was performed for linear regression

**Supplementary Figure S1. Comparison of manual gating vs. heatmap-based cell-type annotation.**

Frequency swarm plots of annotated immune cell types using Cytobank for manual gating compared to the described heatmap annotation-based method. Frequencies are reported as percent of total live, singlet, CD45+ immune cells.

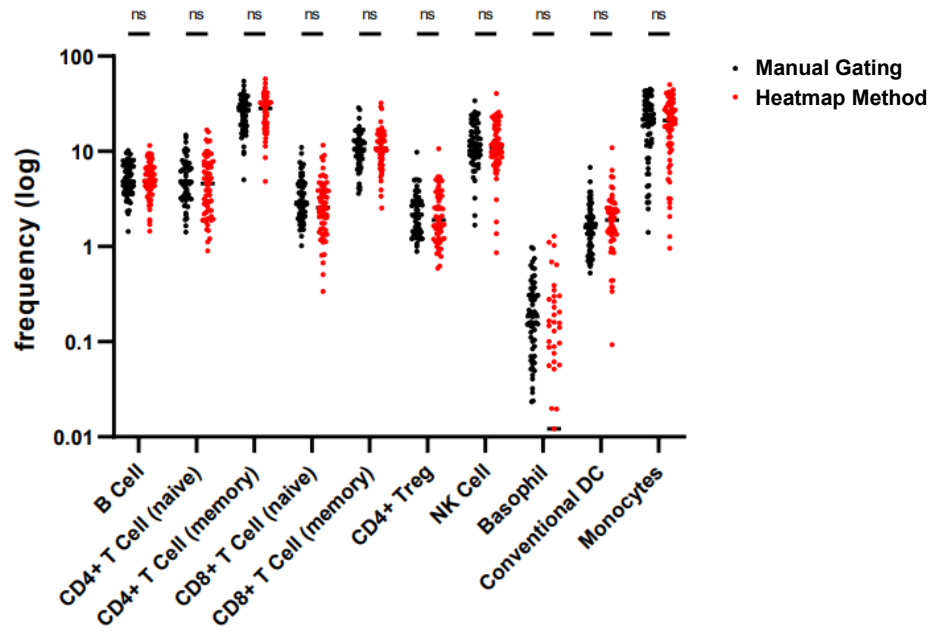

**Supplementary Figure S2. Comparison of FoxP3 expression in CD39hi and CD39low Tregs. (a)**

Comparison of FoxP3 MSI on CD39hi and CD39 low Tregs with each dot representing a single sample in the CyTOF PBMC dataset (both psoriasis and healthy donor cohorts). (b) Comparison of CCR7 MSI expression (arcsinh transformed) on CD39hi FoxP3hi Tregs and CD39hi FoxP3hi CLA+ Tregs between healthy controls and psoriasis samples (\*\*\*\*student T-test p-value < 0.0001).

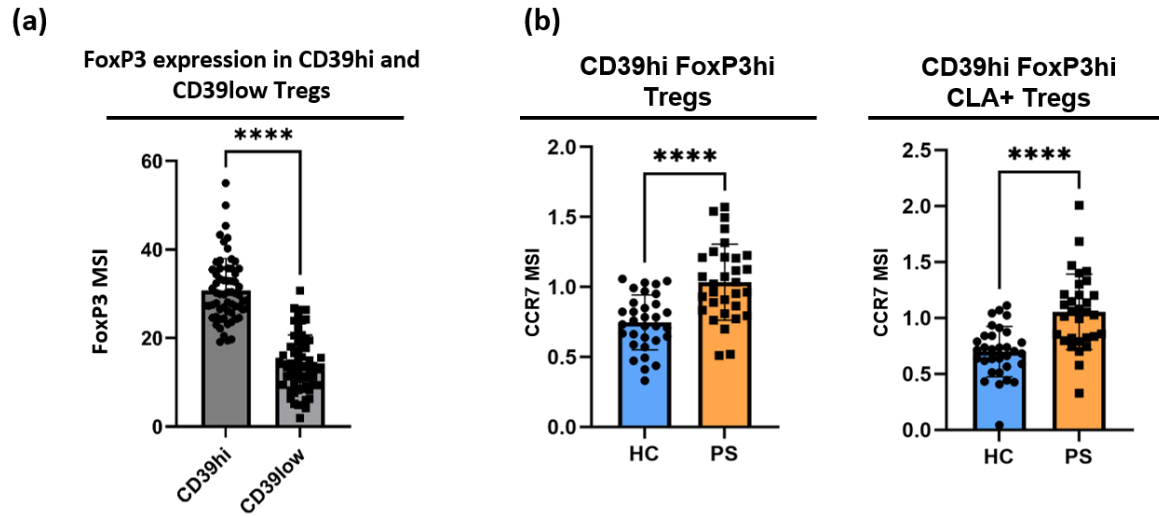

**Supplementary Figure S3. PCA and sex-confounder analysis of CyTOF PBMC data.** (a) PCA conducted on cell-type frequencies for each sample in the CyTOF PBMC dataset. Each dot represents a single sample coloured by sex or age. (b) Comparison of cell type frequencies in the CyTOF dataset by sex using the student's T-test. An asterisk indicates a significantly differing cell type frequency between sexes with a p-value between 0.01 and 0.05. (c). Volcano plots of differentially expressed Treg markers male and female samples on total Tregs and CLAhi Tregs. Blue dots represent markers with increased expression in female samples. The Y-axis denotes  $-\log_{10}$  adjusted p-values and the X-axis denotes  $\log_2$  fold change values based on arcsinh-transformed median signal intensity values (MSI).

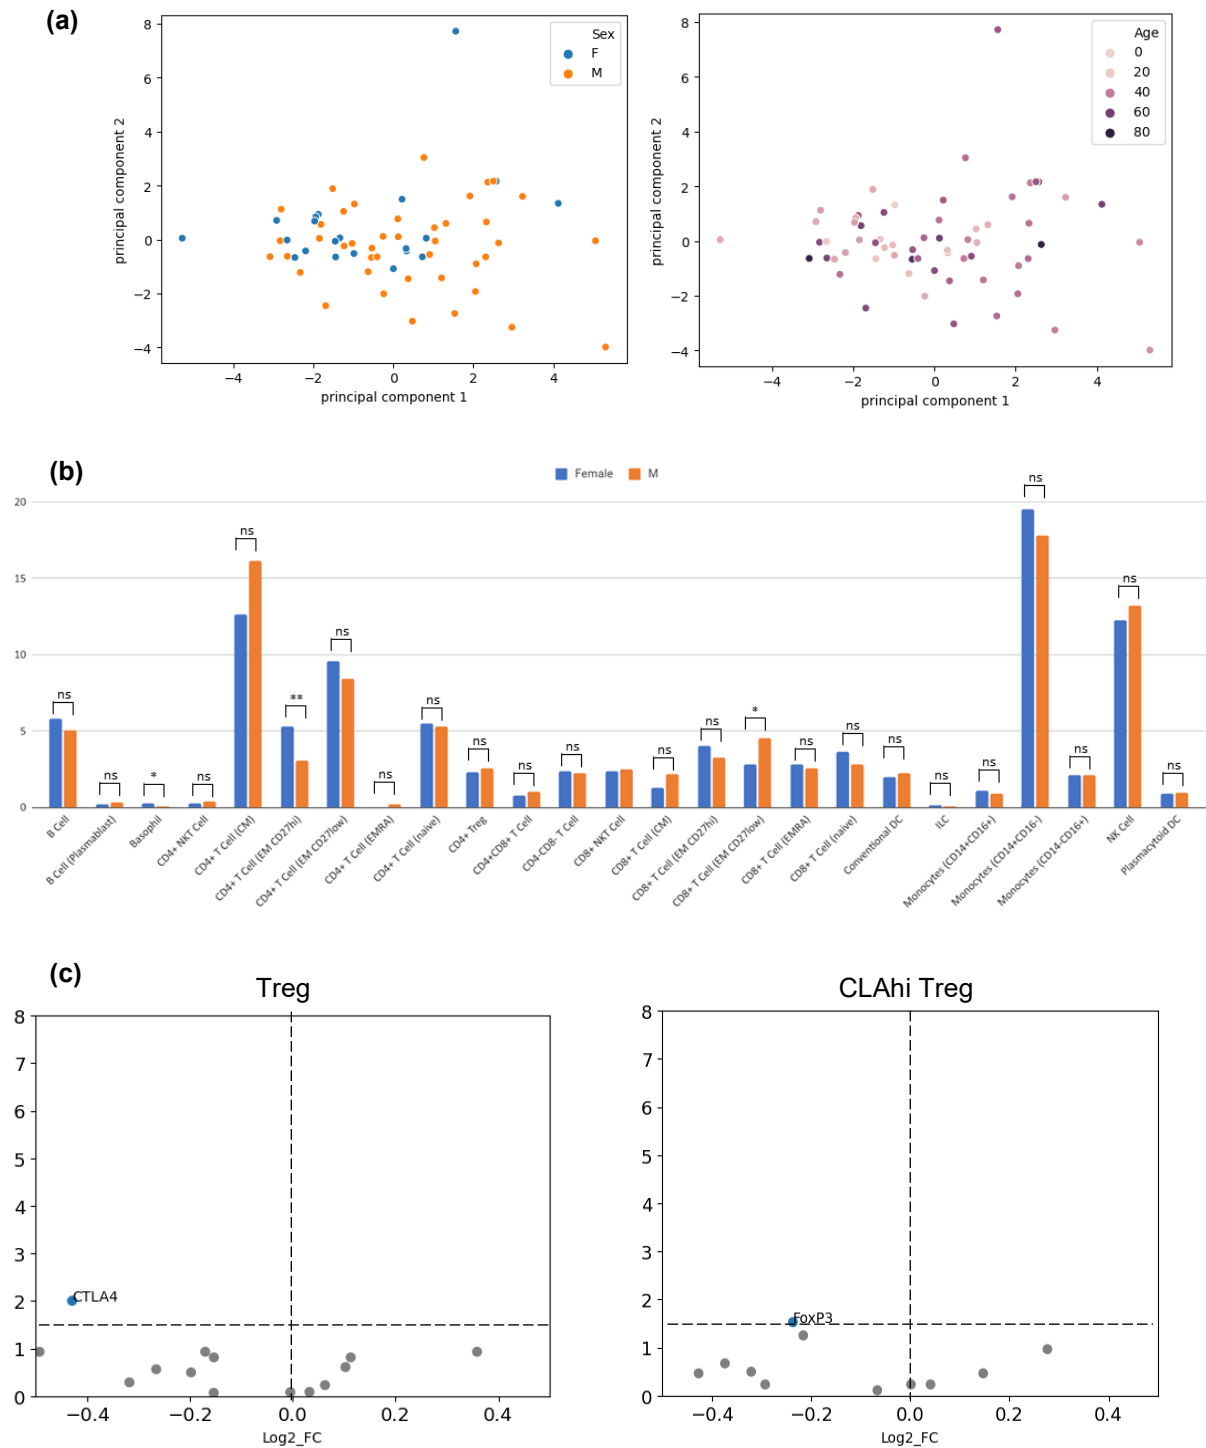

**Supplementary Figure S4. Comparison of PASI score to production of IL-17A+ by psoriatic CD4+RORgt+ T cells and CCR7+ Tregs by FACS.** Psoriasis PBMCs (n=6) were activated for 4 hours with PMA+I and analysed by FACS. (a) Scatterplot of PASI score and frequency of production of IL-17A by CD4+RORgt+ Th17 cells. (b) Scatterplot of PASI score and frequency of production of IL-17A by CCR7+ Tregs.

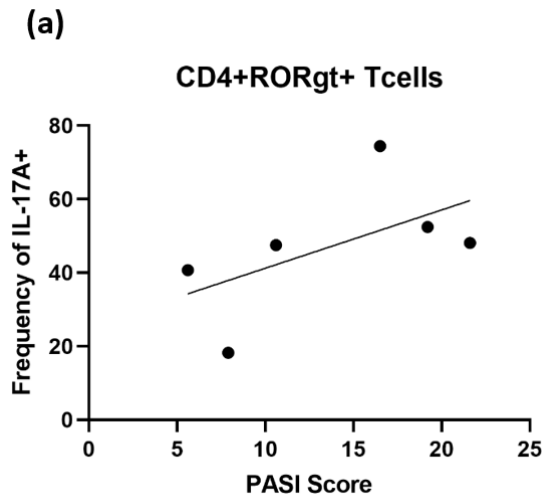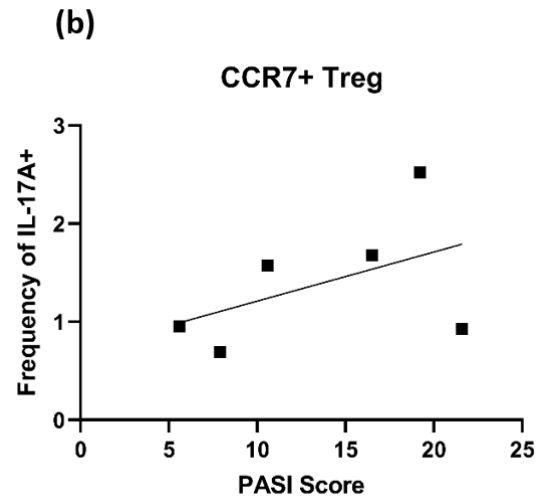

Supplement: mmc1.pdf [file mmc1.pdf]
